# Supplementary material for: A wafer-scale graphene and ferroelectric multilayer for flexible and fast-switched modulation applications
Source: Royal Society of Chemistry journal article supplement (doi:10.1039/c5nr03020j), 2015-01-01
Supplement: c5nr03020j1.pdf [file c5nr03020j1.pdf]

Supplementary information

Wafer-scale graphene and ferroelectric multilayer for flexible  
and fast-switched modulation applications

Minmin Zhu,<sup>ab</sup> Jing Wu,<sup>cd</sup> Zehui Du,<sup>e</sup> Roland Yingjie Tay,<sup>a</sup> Hongling Li,<sup>ab</sup> Barbarous  
Özyilmaz,<sup>cd</sup> Edwin Hang Tong Teo\*<sup>ab</sup>

<sup>a</sup> School of Electrical and Electronic Engineering, Nanyang Technological University,  
50 Nanyang Avenue, Singapore 639798

<sup>b</sup> CINTRA CNRS/NTU/THALES, Nanyang Technological University, Research  
Techno Plaza, 50 Nanyang Drive, Singapore 637553

<sup>c</sup> Graphene Research Center, National University of Singapore, 2 Science Drive 3,  
Singapore 117542

<sup>d</sup> Department of Physics, National University of Singapore, 2 Science Drive 3,  
Singapore 117542

<sup>e</sup> Temasek Laboratories, Nanyang Technological University, Research Techno Plaza,  
50 Nanyang Drive, Singapore 637553.

E-mail: htteo@ntu.edu.sg

### Electro-Optic measurement:

The method is based on the observation of frequency doubling in the detection signal when a laser beam is phase modulated with a fundamental frequency in the system.

The birefringence phase shift ( $\Delta\Phi$ ) is given by:

$$\frac{I}{I_0} = \frac{1}{4} \sin^2\left(\frac{\Delta\Phi\pi}{\lambda}\right) \quad (1)$$

where  $I_0$  and  $I$  are the incident laser intensity and the laser intensity through EO thin films in applied electric field, respectively. The linear (Pockels effect) or quadratic (Kerr effect) EO effect alters the refractive index of the EO materials, which give rise to a shift in phase and thus convert into intensity modulation. The relationship between the phase shift ( $\Delta\Phi$ ) and the birefringence shift ( $\Delta n$ ) is given by:

$$\Delta\Phi = \frac{2\pi}{\lambda} l \Delta n \quad (2)$$

where  $\lambda$  and  $l$  are the wavelength of laser and the light path, respectively.

For these electro-optic materials, the linear and quadratic EO effects are defined as:

$$\Delta n = -\frac{1}{2} n^3 r_c E \quad \text{or} \quad \Delta n = -\frac{1}{2} n^3 R E^2 \quad (3)$$

where  $r_c$ ,  $R$ ,  $n$  and  $E$  are the linear EO coefficient (Pockels coefficient), quadratic EO coefficient (Kerr coefficient), refractive index, and electrical field, respectively. Based on Equation (1), (2) and (3) above, the linear EO coefficient ( $r_c$ ) or quadratic EO coefficient ( $R$ ) can be calculated:

$$r_c = \lambda \Delta\Phi / (\pi n^3 E L) \quad \text{or} \quad R = \lambda \Delta\Phi / (\pi n^3 E^2 L) \quad (4)$$

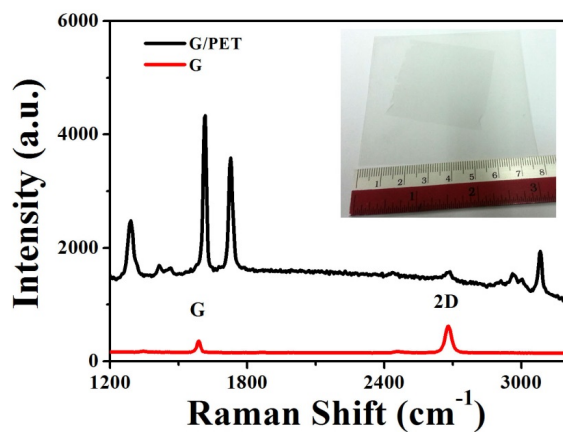

Fig. S1 Raman spectra of bare graphene and graphene/PET film. The inset is optical images of graphene film on PET substrate.

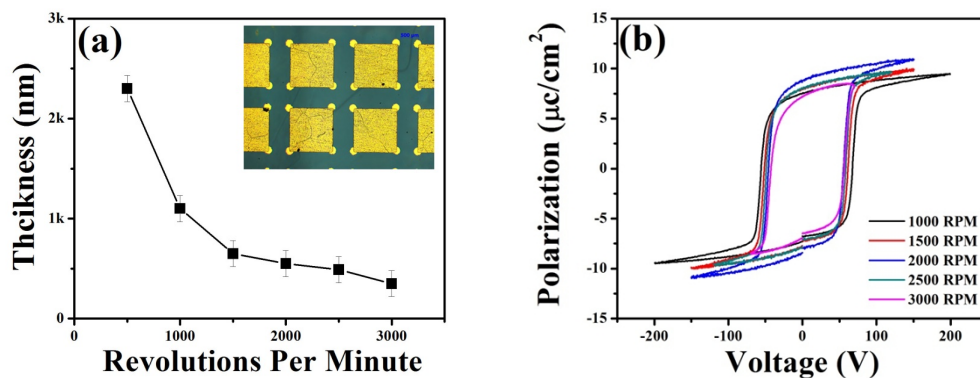

Fig. S2 (a) The thickness and (b) hysteresis polarization loops of P(VDF-TrFE) thin film versus different spin speed. The inset of (a) is G/P(VDF-TrFE) on SiO<sub>2</sub> wafer with Ti/Au (5/100 nm) electrodes for ferroelectric measurement. In each unit cell, the graphene area is 1.44 mm<sup>2</sup>.

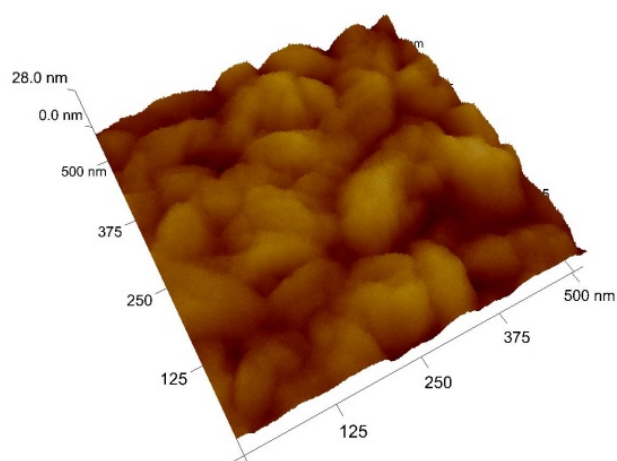

Fig. S3 Surface morphology of P(VDF-TrFE) thin film.

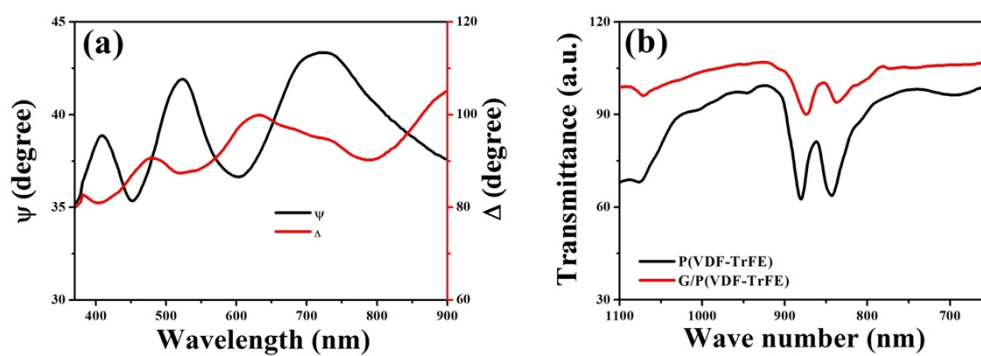

Fig. S4 (a) Spectra of the ellipsometric parameter  $\Psi$  and  $\Delta$  as a function of wave number for P(VDF-TrFE) thin film. (b) FTIR spectra of bare P(VDF-TrFE) and G/P(VDF-TrFE) film.

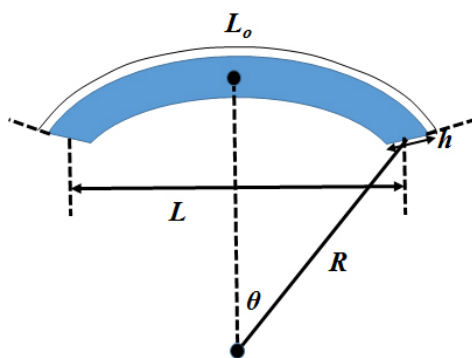

**Fig. S5** Illustration of device bending under the strain.

As shown in Figure S5, the device is bent into an arc shape with a dimension. In this case, the strain in the length direction ( $\epsilon$ ) of the device is given by:

$$R \cdot 2\theta = L_o$$

$$\sin \theta = \sin L_o/2R = L/2R$$

$$\epsilon = h/2R$$

where  $h$  is the thickness of the device (550 nm),  $R$  is the bending radius that varies between  $\sim 7.0$  and  $\sim 2.0$  cm. In this case, the strain ( $\epsilon$ ) is 0.03 -0.394%.

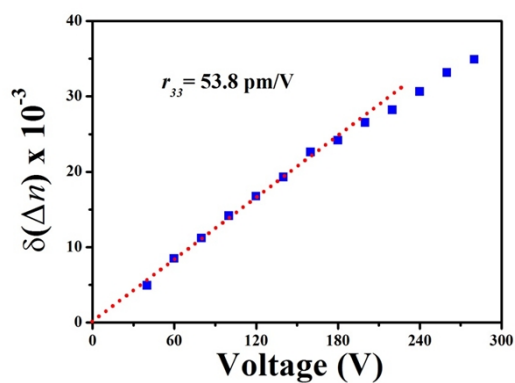

**Fig. S6** Birefringence  $\delta(\Delta n)$  in G/P(VDF-TrFE)/G multilayer film as a function of applied voltage. The thickness of P(VDF-TrFE) thin film is about 1.2  $\mu\text{m}$ .

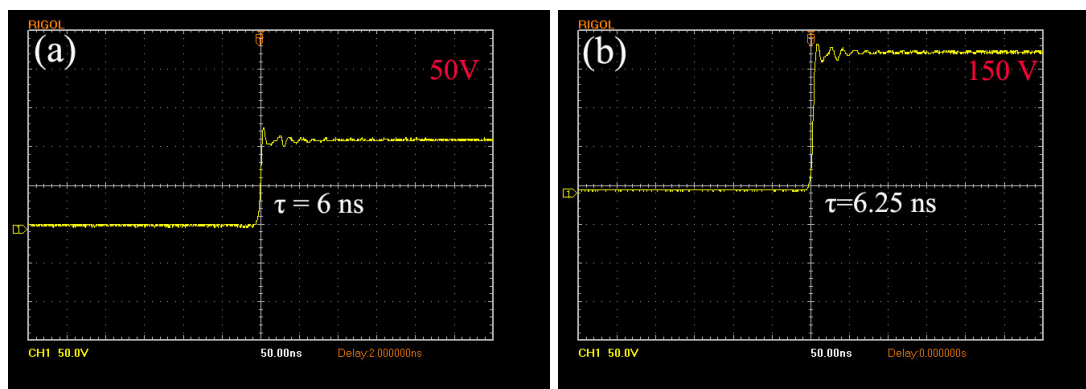

**Fig. S7** The responsivity of switching time ( $\tau$ ) on pulse generator and power amplifier at (a) 50 V and (b) 150 V. The responsivities of switching time are 6 and 6.25 ns, respectively.
